# Supplementary material
Source: PubMed Central journal article supplement (PMC6759835)
Supplement: NIHMS1051288-supplement-supplemental_tables.pdf [file NIHMS1051288-supplement-supplemental_tables.pdf]

# THE LANCET

## Diabetes & Endocrinology

### Supplementary appendix

This appendix formed part of the original submission and has been peer reviewed. We post it as supplied by the authors.

Supplement to: Liu B, Xu G, Sun Y, et al. Association between maternal pre-pregnancy obesity and preterm birth according to maternal age and race or ethnicity: a population-based study. *Lancet Diabetes Endocrinol* 2019; published online August 5. [http://dx.doi.org/10.1016/S2213-8587\(19\)30193-7](http://dx.doi.org/10.1016/S2213-8587(19)30193-7).

## **Supplementary material**

### **Information about variables used in sensitivity analyses.**

Data on the mode of delivery, induction of labour, gestational diabetes, pregnancy-induced hypertension (PIH) or pre-eclampsia, birth weight were obtained directly from the medical record using the facility worksheet. Small for gestational age was defined as birthweights below the 10th percentile for babies of the same gestational age.

**Table S1. The rate of pre-pregnancy BMI categories according to maternal characteristics: the National Vital Statistics System 2016-2017 (N=7,141,630)**

| Variables               | Sample size | BMI categories |                 |                 |                |               |               |
|-------------------------|-------------|----------------|-----------------|-----------------|----------------|---------------|---------------|
|                         |             | <18·5          | 18·5-24·9       | 25-29·9         | 30-34·9        | 35-39·9       | ≥40           |
| Overall, n (%)          | 7141630     | 252685 (3·5)   | 3189165 (44·7)  | 1874668 (26·2)  | 1017698 (14·3) | 482914 (6·8)  | 324500 (4·5)  |
| Age, years, n (%)       |             |                |                 |                 |                |               |               |
| <20                     | 384699      | 28301 (7·36)   | 197036 (51·22)  | 89347 (23·23)   | 43067 (11·19)  | 17787 (4·62)  | 9161 (2·38)   |
| 20-24·9                 | 1465686     | 73756 (5·03)   | 635925 (43·39)  | 368918 (25·17)  | 214044 (14·60) | 104104 (7·10) | 68939 (4·70)  |
| 25-29·9                 | 2099891     | 70841 (3·37)   | 905581 (43·13)  | 552649 (26·32)  | 309975 (14·76) | 153388 (7·30) | 107457 (5·12) |
| 30-34·9                 | 2003581     | 53700 (2·68)   | 925653 (46·20)  | 532406 (26·57)  | 275631 (13·76) | 128544 (6·42) | 87647 (4·37)  |
| 35-39·9                 | 977659      | 22006 (2·25)   | 436203 (44·62)  | 269919 (27·61)  | 142019 (14·53) | 64818 (6·63)  | 42694 (4·37)  |
| ≥40                     | 210114      | 4081 (1·94)    | 88767 (42·25)   | 61429 (29·24)   | 32962 (15·69)  | 14273 (6·79)  | 8602 (4·09)   |
| Race/ethnicity, n (%)   |             |                |                 |                 |                |               |               |
| Hispanic                | 1692126     | 44855 (2·65)   | 650956 (38·47)  | 511782 (30·24)  | 288936 (17·08) | 123728 (7·31) | 71869 (4·25)  |
| Non-Hispanic White      | 3723040     | 129001 (3·46)  | 1792361 (48·14) | 923433 (24·80)  | 480309 (12·90) | 237436 (6·38) | 160500 (4·31) |
| Non-Hispanic Black      | 981654      | 32426 (3·30)   | 340359 (34·67)  | 266745 (27·17)  | 174593 (17·79) | 92637 (9·44)  | 74894 (7·63)  |
| Other                   | 744810      | 46403 (6·23)   | 405489 (54·44)  | 172708 (23·19)  | 73860 (9·92)   | 29113 (3·91)  | 17237 (2·31)  |
| Education levels, n (%) |             |                |                 |                 |                |               |               |
| Lower than high school  | 954384      | 43536 (4·56)   | 386870 (40·54)  | 267941 (28·07)  | 150177 (15·74) | 65209 (6·83)  | 40651 (4·26)  |
| High school             | 1791583     | 73496 (4·10)   | 711091 (39·69)  | 470555 (26·26)  | 288071 (16·08) | 145205 (8·10) | 103165 (5·76) |
| Higher than high school | 4315516     | 132434 (3·07)  | 2054126 (47·60) | 1114338 (25·82) | 568412 (13·17) | 268148 (6·21) | 178058 (4·13) |

|                                    |         |               |                 |                 |                |               |               |
|------------------------------------|---------|---------------|-----------------|-----------------|----------------|---------------|---------------|
| Missing                            | 80147   | 3219 (4.02)   | 37078 (46.26)   | 21834 (27.24)   | 11038 (13.77)  | 4352 (5.43)   | 2626 (3.28)   |
| Marital status, n (%)              |         |               |                 |                 |                |               |               |
| Yes                                | 4036400 | 123445 (3.06) | 1914338 (47.43) | 1056465 (26.17) | 534291 (13.24) | 247963 (6.14) | 159898 (3.96) |
| No                                 | 2669954 | 113400 (4.25) | 1078195 (40.38) | 700779 (26.25)  | 420915 (15.76) | 208018 (7.79) | 148647 (5.57) |
| Missing                            | 435276  | 15840 (3.64)  | 196632 (45.17)  | 117424 (26.98)  | 62492 (14.36)  | 26933 (6.19)  | 15955 (3.67)  |
| Smoking during pregnancy, n (%)    |         |               |                 |                 |                |               |               |
| Yes                                | 497527  | 29935 (6.02)  | 205624 (41.33)  | 119673 (24.05)  | 74703 (15.01)  | 39349 (7.91)  | 28243 (5.68)  |
| No                                 | 6616141 | 221618 (3.35) | 2971861 (44.92) | 1747581 (26.41) | 938762 (14.19) | 441513 (6.67) | 294806 (4.46) |
| Missing                            | 27962   | 1132 (4.05)   | 11680 (41.77)   | 7414 (26.51)    | 4233 (15.14)   | 2052 (7.34)   | 1451 (5.19)   |
| Parity, n (%)                      |         |               |                 |                 |                |               |               |
| 1                                  | 2757355 | 121578 (4.41) | 1359507 (49.30) | 678888 (24.62)  | 335503 (12.17) | 156774 (5.69) | 105105 (3.81) |
| 2                                  | 2292577 | 76099 (3.32)  | 1024714 (44.70) | 604965 (26.39)  | 325747 (14.21) | 155895 (6.80) | 105157 (4.59) |
| 3                                  | 1205538 | 33525 (2.78)  | 487219 (40.42)  | 335201 (27.81)  | 194556 (16.14) | 92355 (7.66)  | 62682 (5.20)  |
| ≥4                                 | 868564  | 20837 (2.40)  | 309980 (35.69)  | 251020 (28.90)  | 159326 (18.34) | 76685 (8.83)  | 50716 (5.84)  |
| Missing                            | 17596   | 646 (3.67)    | 7745 (44.02)    | 4594 (26.11)    | 2566 (14.58)   | 1205 (6.85)   | 840 (4.77)    |
| Preterm birth <sup>a</sup> , n (%) |         |               |                 |                 |                |               |               |
| Overall                            | 527637  | 23804 (4.51)  | 217098 (41.15)  | 133593 (25.32)  | 80838 (15.32)  | 41462 (7.86)  | 30842 (5.85)  |
| Extremely preterm birth            | 25031   | 968 (3.87)    | 8948 (35.75)    | 6279 (25.08)    | 4503 (17.99)   | 2490 (9.95)   | 1843 (7.36)   |
| Very preterm birth                 | 43690   | 2016 (4.61)   | 17152 (39.26)   | 10915 (24.98)   | 7052 (16.14)   | 3783 (8.66)   | 2772 (6.34)   |
| Moderately preterm birth           | 458916  | 20820 (4.54)  | 190998 (41.62)  | 116399 (25.36)  | 69283 (15.10)  | 35189 (7.67)  | 26227 (5.71)  |
| Initiation of prenatal care, n (%) |         |               |                 |                 |                |               |               |

|                        |         |               |                 |                 |                |               |               |
|------------------------|---------|---------------|-----------------|-----------------|----------------|---------------|---------------|
| 1st to 3rd month       | 5399926 | 180678 (3·35) | 2432460 (45·05) | 1410552 (26·12) | 763592 (14·14) | 365861 (6·78) | 246783 (4·57) |
| 4th to 6th month       | 1162737 | 46575 (4·01)  | 501107 (43·10)  | 309626 (26·63)  | 171718 (14·77) | 80013 (6·88)  | 53698 (4·62)  |
| 7th to final month     | 319100  | 13188 (4·13)  | 135895 (42·59)  | 87213 (27·33)   | 47609 (14·92)  | 21284 (6·67)  | 13911 (4·36)  |
| No prenatal care       | 103625  | 5316 (5·13)   | 47668 (46·00)   | 27014 (26·07)   | 13872 (13·39)  | 6010 (5·80)   | 3745 (3·61)   |
| Missing                | 156242  | 6928 (4·43)   | 72035 (46·10)   | 40263 (25·77)   | 20907 (13·38)  | 9746 (6·24)   | 6363 (4·07)   |
| Previous preterm birth |         |               |                 |                 |                |               |               |
| Yes                    | 212163  | 7900 (3·72)   | 83518 (39·37)   | 56476 (26·62)   | 34690 (16·35)  | 17281 (8·15)  | 12298 (5·80)  |
| No                     | 4169248 | 123098 (2·95) | 1744855 (41·85) | 1138563 (27·31) | 647083 (15·52) | 608664 (7·40) | 206985 (4·96) |
| Nulliparous            | 2755067 | 121484 (4·41) | 1358442 (49·31) | 678328 (24·62)  | 335199 (12·17) | 156613 (5·68) | 105001 (3·81) |
| Missing                | 5152    | 203 (3·94)    | 2350 (45·61)    | 1301 (25·25)    | 726 (14·09)    | 356 (6·91)    | 216 (4·19)    |

BMI, body mass index;

<sup>a</sup> extremely preterm birth: <28 gestational weeks; very preterm birth: 28-37 gestational weeks; moderately preterm birth 32-37 gestational weeks

**Table S2. The associations between pre-pregnancy BMI and subtype of preterm birth: NVSS 2016-2017**

| Variables     | Moderately preterm birth      | Very preterm birth | Extremely preterm birth |
|---------------|-------------------------------|--------------------|-------------------------|
| Underweight   | 1.33 (1.31-1.35) <sup>a</sup> | 1.38 (1.32-1.45)   | 1.24 (1.16-1.32)        |
| Normal weight | 1.00 (ref)                    | 1.00 (ref)         | 1.00 (ref)              |
| Overweight    | 1.01 (1.00-1.02)              | 1.05 (1.03-1.08)   | 1.15 (1.12-1.19)        |
| Obese         | 1.15 (1.14-1.16)              | 1.31 (1.28-1.34)   | 1.61 (1.56-1.66)        |
| Obesity I     | 1.10 (1.09-1.11)              | 1.23 (1.19-1.26)   | 1.49 (1.44-1.55)        |
| Obesity II    | 1.17 (1.16-1.19)              | 1.38 (1.33-1.43)   | 1.72 (1.64-1.79)        |
| Obesity III   | 1.30 (1.28-1.32)              | 1.47 (1.41-1.53)   | 1.82 (1.73-1.91)        |

<sup>a</sup> OR; 95% CI in parentheses (all such values)

Maternal age, race/ethnicity, parity, education levels, smoking during pregnancy, previous history of preterm birth, marital status, infant sex, and initiation of prenatal care were adjusted in models.

**Table S3. Crude ORs of the associations between pre-pregnancy BMI and preterm birth: NVSS 2016-2017**

| Variables                    | Underweight            |                         | Normal weight              |                      | Overweight                 |                         | Obese                      |                          | Categories of obesity      |                         |                            |                         |                            |                         |
|------------------------------|------------------------|-------------------------|----------------------------|----------------------|----------------------------|-------------------------|----------------------------|--------------------------|----------------------------|-------------------------|----------------------------|-------------------------|----------------------------|-------------------------|
|                              | Cases/<br>participants | Crude<br>OR (95%<br>CI) | Cases/<br>participan<br>ts | Crude OR<br>(95% CI) | Cases/<br>participan<br>ts | Crude OR<br>(95% CI)    | Cases/<br>participan<br>ts | Crude OR<br>(95% CI)     | Obesity I                  |                         | Obesity II                 |                         | Obesity III                |                         |
|                              |                        |                         |                            |                      |                            |                         |                            |                          | Cases/<br>participan<br>ts | Crude OR<br>(95% CI)    | Cases/<br>participan<br>ts | Crude OR<br>(95% CI)    | Cases/<br>participan<br>ts | Crude OR<br>(95% CI)    |
| Overall                      | 23804/<br>252685       | 1.42 (1.40-<br>1.44)    | 217098/<br>3189165         | 1.00 (ref)           | 133593/<br>1874668         | 1.05<br>(1.04-<br>1.06) | 153142/<br>1825112         | 1.25<br>(1.25-<br>1.26)  | 80838/<br>1017698          | 1.18<br>(1.17-<br>1.19) | 41462/<br>482914           | 1.29<br>(1.27-<br>1.30) | 30842/<br>324500           | 1.44<br>(1.42-<br>1.46) |
| Age group <sup>b</sup>       |                        |                         |                            |                      |                            |                         |                            |                          |                            |                         |                            |                         |                            |                         |
| < 20 years                   | 3234/<br>28301         | 1.31 (1.26-<br>1.36)    | 17660/<br>197036           | 1.00 (ref)           | 6903/<br>89347             | 0.85<br>(0.83-<br>0.88) | 5676/<br>70015             | 0.90<br>(0.87-<br>0.92)  | 3464/<br>43067             | 0.89<br>(0.86-<br>0.92) | 1407/<br>17787             | 0.87<br>(0.82-<br>0.92) | 805/<br>9161               | 0.98<br>(0.91-<br>1.05) |
| 20-24 years                  | 7771/<br>73756         | 1.43 (1.40-<br>1.47)    | 48269/<br>635925           | 1.00 (ref)           | 26075/<br>368918           | 0.93<br>(0.91-<br>0.94) | 29001/<br>387087           | 0.99<br>(0.97-<br>1.001) | 15448/<br>214044           | 0.95<br>(0.93-<br>0.97) | 7870/<br>104104            | 1.00<br>(0.97-<br>1.02) | 5683/<br>68939             | 1.09<br>(1.06-<br>1.13) |
| 25-29 years                  | 6215/<br>70841         | 1.40 (1.37-<br>1.44)    | 58130/<br>905581           | 1.00 (ref)           | 36213/<br>552649           | 1.02<br>(1.01-<br>1.04) | 44424/<br>570820           | 1.23<br>(1.22-<br>1.25)  | 22697/<br>309975           | 1.15<br>(1.13-<br>1.17) | 12212/<br>153388           | 1.26<br>(1.24-<br>1.29) | 9515/<br>107457            | 1.42<br>(1.39-<br>1.45) |
| 30-34 years                  | 4261/<br>53700         | 1.35 (1.31-<br>1.40)    | 55426/<br>925653           | 1.00 (ref)           | 36280/<br>532406           | 1.15<br>(1.13-<br>1.16) | 41886/<br>491822           | 1.46<br>(1.44-<br>1.48)  | 21992/<br>275631           | 1.36<br>(1.34-<br>1.38) | 11235/<br>128544           | 1.50<br>(1.47-<br>1.54) | 8659/<br>87647             | 1.72<br>(1.68-<br>1.76) |
| 35-39 years                  | 1929/<br>22006         | 1.32 (1.26-<br>1.38)    | 29670/<br>436203           | 1.00 (ref)           | 21747/<br>269919           | 1.20<br>(1.18-<br>1.22) | 25186/<br>249531           | 1.54<br>(1.51-<br>1.57)  | 13357/<br>142019           | 1.42<br>(1.39-<br>1.45) | 6875/<br>64818             | 1.63<br>(1.58-<br>1.67) | 4954/<br>42694             | 1.80<br>(1.74-<br>1.86) |
| ≥ 40 years                   | 394/<br>4081           | 1.09 (0.98-<br>1.21)    | 7943/<br>88767             | 1.00 (ref)           | 6375/<br>61429             | 1.18<br>(1.14-<br>1.22) | 6969/<br>55837             | 1.45<br>(1.40-<br>1.50)  | 3880/<br>32962             | 1.36<br>(1.30-<br>1.41) | 1863/<br>14273             | 1.53<br>(1.45-<br>1.61) | 1226/<br>8602              | 1.69<br>(1.58-<br>1.80) |
| Race/ ethnicity <sup>c</sup> |                        |                         |                            |                      |                            |                         |                            |                          |                            |                         |                            |                         |                            |                         |
| Hispanic                     | 4109/<br>44855         | 1.34 (1.29-<br>1.38)    | 45625/<br>650956           | 1.00 (ref)           | 37245/<br>511782           | 1.04<br>(1.03-<br>1.06) | 40632/<br>484533           | 1.21<br>(1.20-<br>1.23)  | 23126/<br>288936           | 1.15<br>(1.14-<br>1.17) | 10706/<br>123728           | 1.26<br>(1.23-<br>1.29) | 6800/<br>71869             | 1.39<br>(1.35-<br>1.43) |
| non-Hispanic<br>white        | 12044/<br>129001       | 1.59 (1.56-<br>1.62)    | 108900/<br>1792361         | 1.00 (ref)           | 57646/<br>923433           | 1.03<br>(1.02-<br>1.04) | 65988/<br>878245           | 1.26<br>(1.24-<br>1.27)  | 33710/<br>480309           | 1.17<br>(1.15-<br>1.18) | 18176/<br>237436           | 1.28<br>(1.26-<br>1.30) | 14102/<br>160500           | 1.49<br>(1.46-<br>1.52) |
| non-Hispanic<br>black        | 4480/<br>32426         | 1.35 (1.31-<br>1.40)    | 36102/<br>340359           | 1.00 (ref)           | 25797/<br>266745           | 0.90<br>(0.89-<br>0.92) | 57646/<br>923433           | 0.995<br>(0.98-<br>1.01) | 17735/<br>174593           | 0.95<br>(0.94-<br>0.97) | 10045/<br>92637            | 1.03<br>(1.00-<br>1.05) | 8350/<br>74894             | 1.06<br>(1.03-<br>1.09) |
| Other                        | 3171/<br>46403         | 1.05 (1.01-<br>1.09)    | 26471/<br>405489           | 1.00 (ref)           | 12905/<br>172708           | 1.16<br>(1.13-<br>1.18) | 12044/<br>129001           | 1.36<br>(1.32-<br>1.39)  | 6267/<br>73860             | 1.33<br>(1.29-<br>1.37) | 2535/<br>29113             | 1.37<br>(1.31-<br>1.43) | 1590/<br>17237             | 1.46<br>(1.38-<br>1.54) |

**Table S4. Sensitivity analysis for the associations between pre-pregnancy BMI and preterm birth: NVSS 2016-2017**

| Participants                                                                                               | Underweight                   | Normal weight | Overweight        | Obese            | Categories of obesity |                  |                  |
|------------------------------------------------------------------------------------------------------------|-------------------------------|---------------|-------------------|------------------|-----------------------|------------------|------------------|
|                                                                                                            |                               |               |                   |                  | Obesity I             | Obesity II       | Obesity III      |
| Overall                                                                                                    | 1.33 (1.31-1.35) <sup>a</sup> | 1.00 (ref)    | 1.02 (1.01-1.03)  | 1.18 (1.18-1.19) | 1.12 (1.11-1.13)      | 1.21 (1.20-1.23) | 1.34 (1.32-1.35) |
| Excluding women with Caesarean section                                                                     | 1.34 (1.31-1.36)              | 1.00 (ref)    | 1.01 (0.996-1.02) | 1.13 (1.12-1.14) | 1.08 (1.07-1.10)      | 1.16 (1.14-1.18) | 1.29 (1.27-1.32) |
| Excluding women with induction of labour                                                                   | 1.32 (1.30-1.34)              | 1.00 (ref)    | 1.04 (1.03-1.05)  | 1.23 (1.22-1.24) | 1.16 (1.15-1.17)      | 1.27 (1.25-1.28) | 1.42 (1.40-1.44) |
| Excluding women with PIH or pre-eclampsia                                                                  | 1.36 (1.34-1.38)              | 1.00 (ref)    | 0.98 (0.97-0.99)  | 1.07 (1.06-1.07) | 1.03 (1.02-1.04)      | 1.08 (1.07-1.09) | 1.15 (1.13-1.17) |
| Excluding women with gestational diabetes                                                                  | 1.33 (1.31-1.35)              | 1.00 (ref)    | 1.01 (0.998-1.01) | 1.14 (1.13-1.15) | 1.09 (1.08-1.10)      | 1.16 (1.14-1.17) | 1.26 (1.24-1.28) |
| Excluding women with SGA                                                                                   | 1.34 (1.32-1.37)              | 1.00 (ref)    | 1.01 (1.004-1.02) | 1.17 (1.16-1.18) | 1.11 (1.10-1.12)      | 1.20 (1.19-1.22) | 1.33 (1.31-1.35) |
| Excluding women Caesarean section, induction of labour, PIH or pre-eclampsia, gestational diabetes, or SGA | 1.35 (1.32-1.38)              | 1.00 (ref)    | 1.00 (0.99-1.02)  | 1.12 (1.11-1.14) | 1.08 (1.06-1.10)      | 1.14 (1.11-1.17) | 1.31 (1.28-1.35) |

<sup>a</sup> OR; 95% CI in parentheses (all such values)

Maternal age, race/ethnicity, parity, education levels, smoking during pregnancy, previous history of preterm birth, marital status, infant sex, and initiation of prenatal care were adjusted in models.

PIH indicates pregnancy-induced hypertension



**Table S5. The associations between pre-pregnancy BMI and preterm birth after excluding participant with incomplete covariate data**

| Variables                    | Underweight                   | Normal weight | Overweight       | Obese            | Categories of obesity |                  |                  |
|------------------------------|-------------------------------|---------------|------------------|------------------|-----------------------|------------------|------------------|
|                              |                               |               |                  |                  | Obesity I             | Obesity II       | Obesity III      |
| Overall                      | 1.34 (1.32-1.36) <sup>a</sup> | 1.00 (ref)    | 1.02 (1.01-1.03) | 1.18 (1.17-1.19) | 1.12 (1.11-1.13)      | 1.21 (1.19-1.22) | 1.33 (1.31-1.35) |
| Age group <sup>b</sup>       |                               |               |                  |                  |                       |                  |                  |
| < 20 years                   | 1.33 (1.27-1.38)              | 1.00 (ref)    | 0.85 (0.82-0.88) | 0.89 (0.86-0.92) | 0.88 (0.85-0.92)      | 0.86 (0.81-0.91) | 0.96 (0.89-1.04) |
| 20-24 years                  | 1.39 (1.36-1.44)              | 1.00 (ref)    | 0.93 (0.91-0.94) | 0.98 (0.96-0.99) | 0.94 (0.92-0.96)      | 0.99 (0.96-1.01) | 1.07 (1.04-1.10) |
| 25-29 years                  | 1.31 (1.28-1.35)              | 1.00 (ref)    | 1.00 (0.99-1.01) | 1.16 (1.15-1.18) | 1.10 (1.08-1.12)      | 1.19 (1.16-1.22) | 1.31 (1.27-1.34) |
| 30-34 years                  | 1.27 (1.23-1.32)              | 1.00 (ref)    | 1.09 (1.07-1.11) | 1.32 (1.30-1.34) | 1.24 (1.22-1.26)      | 1.35 (1.32-1.38) | 1.51 (1.48-1.55) |
| 35-39 years                  | 1.21 (1.15-1.28)              | 1.00 (ref)    | 1.13 (1.11-1.15) | 1.37 (1.35-1.40) | 1.28 (1.25-1.31)      | 1.45 (1.40-1.49) | 1.56 (1.51-1.62) |
| ≥ 40 years                   | 1.00 (0.88-1.12)              | 1.00 (ref)    | 1.14 (1.09-1.18) | 1.37 (1.31-1.42) | 1.28 (1.23-1.34)      | 1.44 (1.35-1.52) | 1.56 (1.46-1.67) |
| Race/ ethnicity <sup>c</sup> |                               |               |                  |                  |                       |                  |                  |
| Hispanic                     | 1.34 (1.30-1.39)              | 1.00 (ref)    | 1.03 (1.02-1.05) | 1.20 (1.18-1.21) | 1.13 (1.11-1.15)      | 1.24 (1.21-1.27) | 1.37 (1.33-1.41) |
| non-Hispanic white           | 1.42 (1.39-1.45)              | 1.00 (ref)    | 1.03 (1.01-1.04) | 1.24 (1.22-1.25) | 1.15 (1.14-1.17)      | 1.26 (1.24-1.28) | 1.45 (1.43-1.48) |
| non-Hispanic black           | 1.34 (1.29-1.39)              | 1.00 (ref)    | 0.91 (0.89-0.93) | 0.99 (0.97-1.01) | 0.95 (0.93-0.97)      | 1.02 (0.99-1.04) | 1.05 (1.02-1.08) |
| Others                       | 1.06 (1.01-1.10)              | 1.00 (ref)    | 1.11 (1.08-1.13) | 1.23 (1.19-1.26) | 1.22 (1.18-1.26)      | 1.23 (1.17-1.29) | 1.28 (1.21-1.36) |

<sup>a</sup> OR; 95% CI in parentheses (all such values)

Maternal age, race/ethnicity, parity, education levels, smoking during pregnancy, previous history of preterm birth, marital status, infant sex, and initiation of prenatal care were adjusted in models.

<sup>b</sup> Maternal age was not included in this model.

<sup>c</sup> Race/ethnicity was not included in this model.

**Table S6. The associations between pre-pregnancy BMI and preterm birth after additional adjustment for gestational weight gain**

| Variables                    | Underweight      | Normal weight | Overweight        | Obese            | Categories of obesity |                  |                  |
|------------------------------|------------------|---------------|-------------------|------------------|-----------------------|------------------|------------------|
|                              |                  |               |                   |                  | Obesity I             | Obesity II       | Obesity III      |
| Overall                      | 1.36 (1.32-1.36) | 1.00 (ref)    | 1.00 (0.99-1.00)  | 1.12 (1.11-1.12) | 1.07 (1.06-1.08)      | 1.14 (1.12-1.15) | 1.23 (1.22-1.25) |
| Age group <sup>b</sup>       |                  |               |                   |                  |                       |                  |                  |
| < 20 years                   | 1.34 (1.28-1.39) | 1.00 (ref)    | 0.82 (0.80-0.85)  | 0.81 (0.78-0.83) | 0.82 (0.79-0.85)      | 0.77 (0.72-0.81) | 0.82 (0.76-0.88) |
| 20-24 years                  | 1.41 (1.38-1.45) | 1.00 (ref)    | 0.92 (0.89-0.92)  | 0.91 (0.89-0.92) | 0.89 (0.87-0.91)      | 0.90 (0.88-0.93) | 0.96 (0.93-0.99) |
| 25-29 years                  | 1.32 (1.28-1.35) | 1.00 (ref)    | 0.98 (0.97-0.99)  | 1.09 (1.08-1.11) | 1.05 (1.03-1.07)      | 1.10 (1.09-1.13) | 1.21 (1.18-1.23) |
| 30-34 years                  | 1.26 (1.22-1.30) | 1.00 (ref)    | 1.07 (1.06-1.09)  | 1.26 (1.25-1.28) | 1.20 (1.18-1.23)      | 1.29 (1.26-1.32) | 1.43 (1.39-1.47) |
| 35-39 years                  | 1.23 (1.18-1.30) | 1.00 (ref)    | 1.12 (1.10-1.14)  | 1.35 (1.33-1.38) | 1.27 (1.24-1.30)      | 1.43 (1.39-1.48) | 1.54 (1.48-1.59) |
| ≥ 40 years                   | 1.01 (0.91-1.13) | 1.00 (ref)    | 1.13 (1.09-1.17)  | 1.36 (1.31-1.41) | 1.29 (1.23-1.34)      | 1.43 (1.35-1.51) | 1.56 (1.45-1.67) |
| Race/ ethnicity <sup>c</sup> |                  |               |                   |                  |                       |                  |                  |
| Hispanic                     | 1.34 (1.29-1.38) | 1.00 (ref)    | 1.01 (0.999-1.03) | 1.16 (1.14-1.17) | 1.11 (1.09-1.13)      | 1.19 (1.17-1.22) | 1.31 (1.27-1.35) |
| non-Hispanic white           | 1.43 (1.40-1.46) | 1.00 (ref)    | 1.00 (0.99-1.01)  | 1.14 (1.13-1.15) | 1.08 (1.07-1.10)      | 1.15 (1.13-1.17) | 1.30 (1.28-1.33) |
| non-Hispanic black           | 1.34 (1.30-1.39) | 1.00 (ref)    | 0.89 (0.87-0.91)  | 0.94 (0.93-0.96) | 0.91 (0.90-0.93)      | 0.96 (0.94-0.98) | 0.98 (0.96-1.01) |
| Other                        | 1.08 (1.04-1.12) | 1.00 (ref)    | 1.09 (1.07-1.12)  | 1.20 (1.17-1.23) | 1.19 (1.16-1.23)      | 1.19 (1.14-1.24) | 1.23 (1.16-1.30) |

<sup>a</sup> OR; 95% CI in parentheses (all such values)

Maternal age, race/ethnicity, parity, education levels, smoking during pregnancy, previous history of preterm birth, marital status, infant sex, initiation of prenatal care, and weight gain (kg/week) were adjusted in models.

<sup>b</sup> Maternal age was not included in this model.

<sup>c</sup> Race/ethnicity was not included in this model.

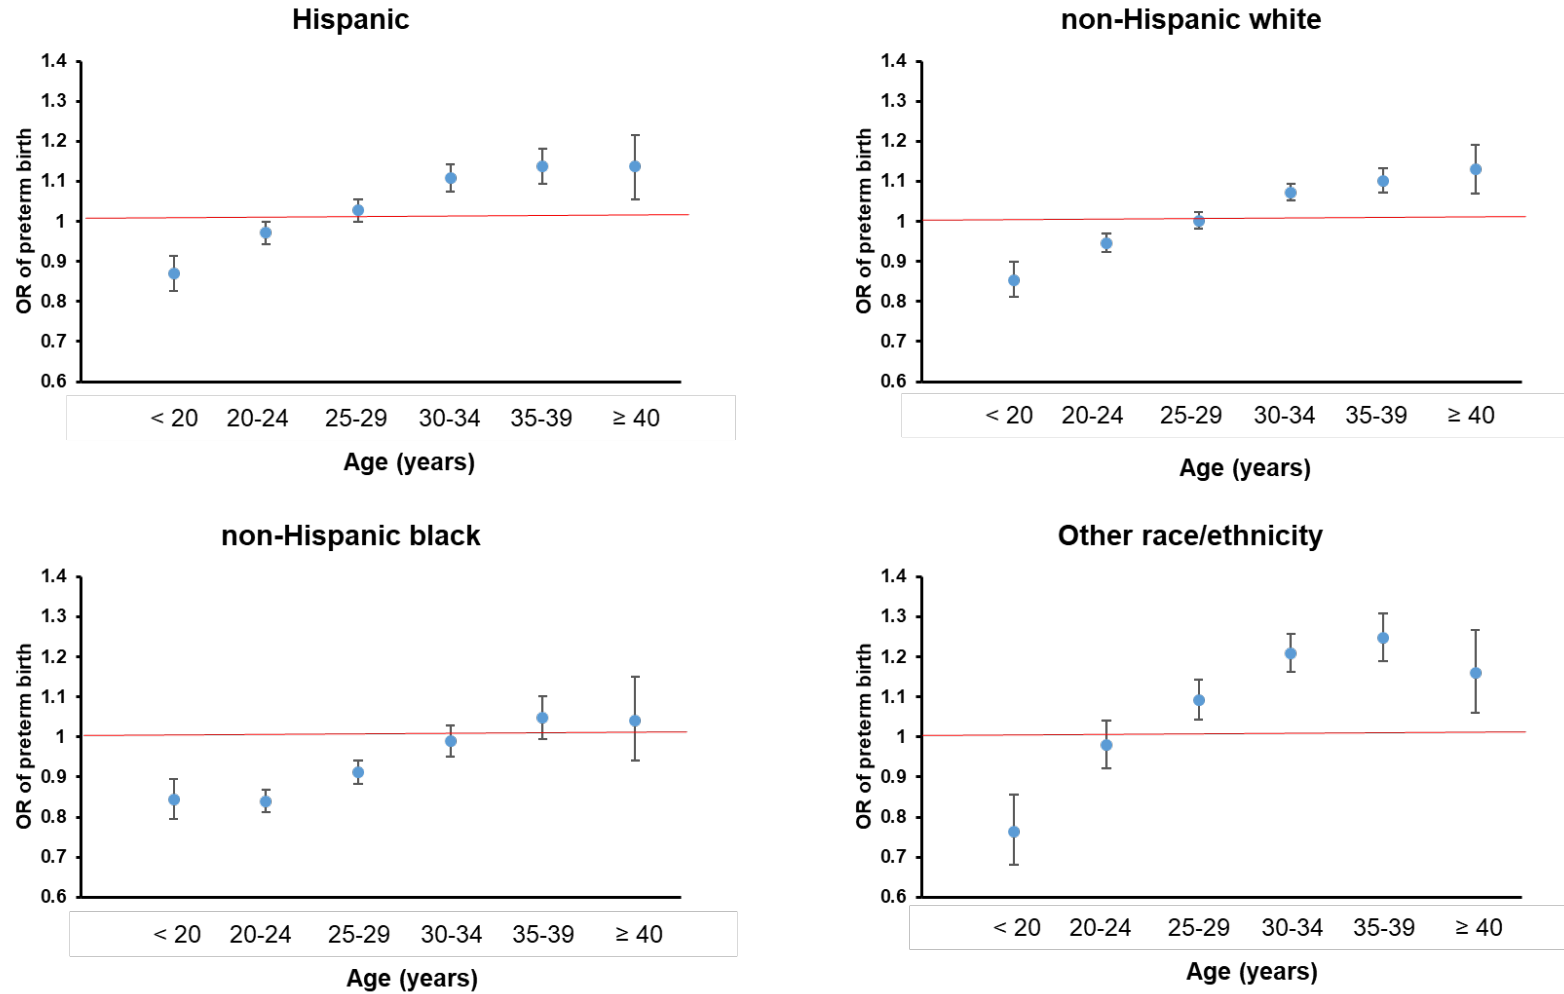

**Figure S1. The associations between pre-pregnancy overweight and risk of preterm birth in each age\*race/ethnicity subgroup: NVSS 2016-2017**

Parity, education levels, smoking during pregnancy, previous history of preterm birth, marital status, infant sex, material status, and initiation of prenatal care were adjusted in models.

Women with normal weight was the reference group.

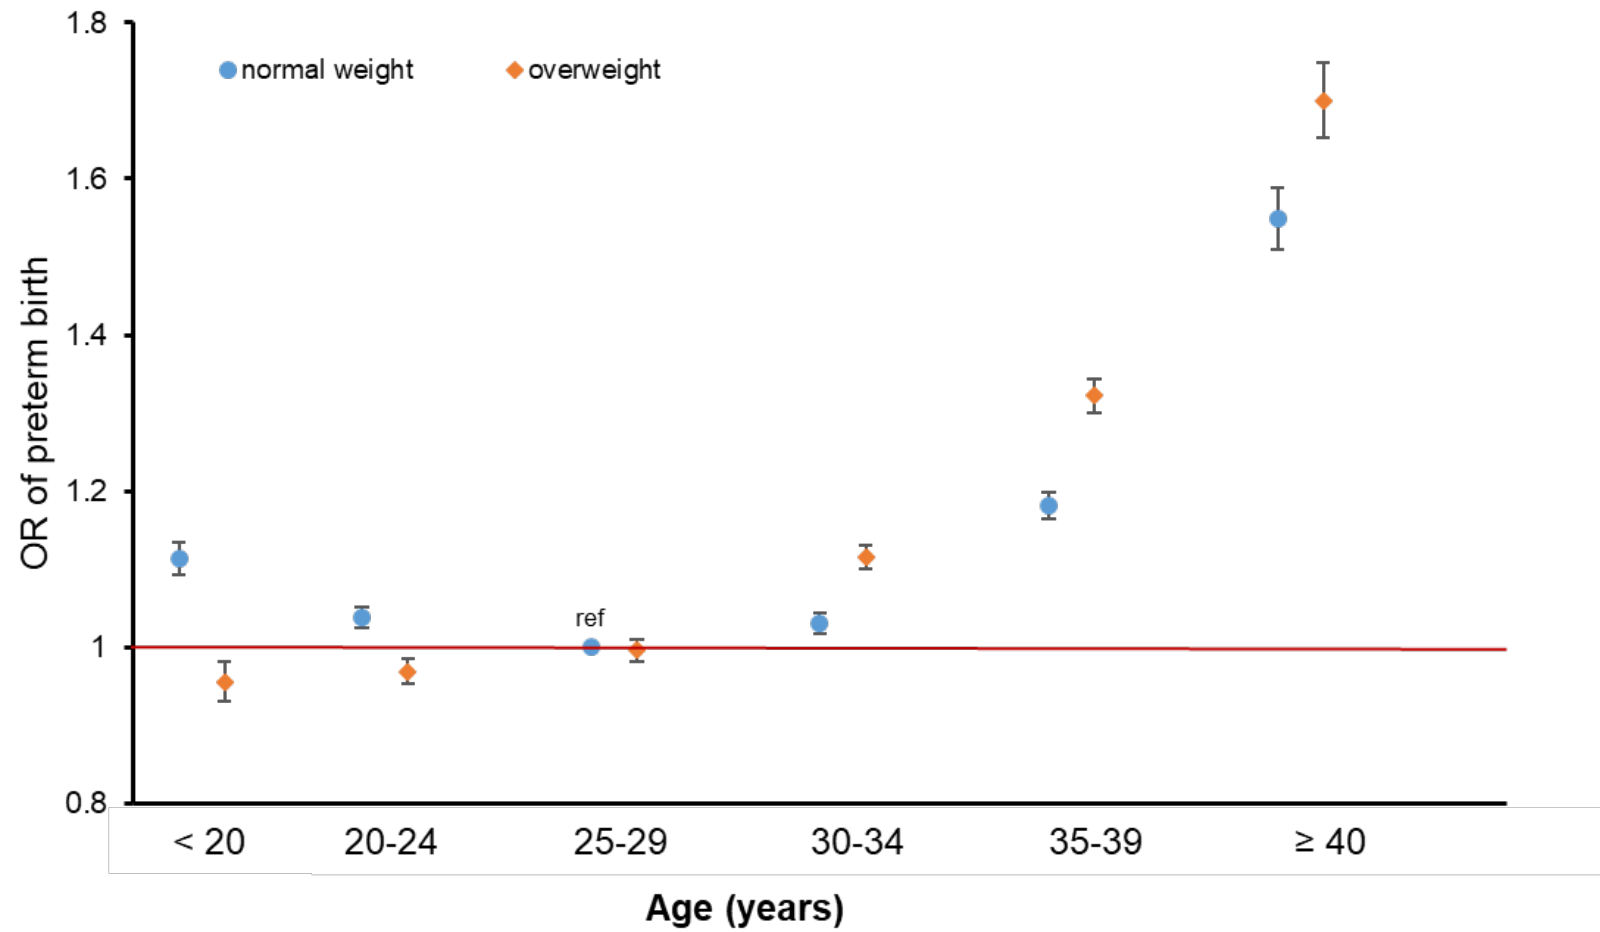

Figure S2. OR of preterm birth for women at different age and overweight compared with normal weight women aged 25-29 years old: NVSS 2016-2017

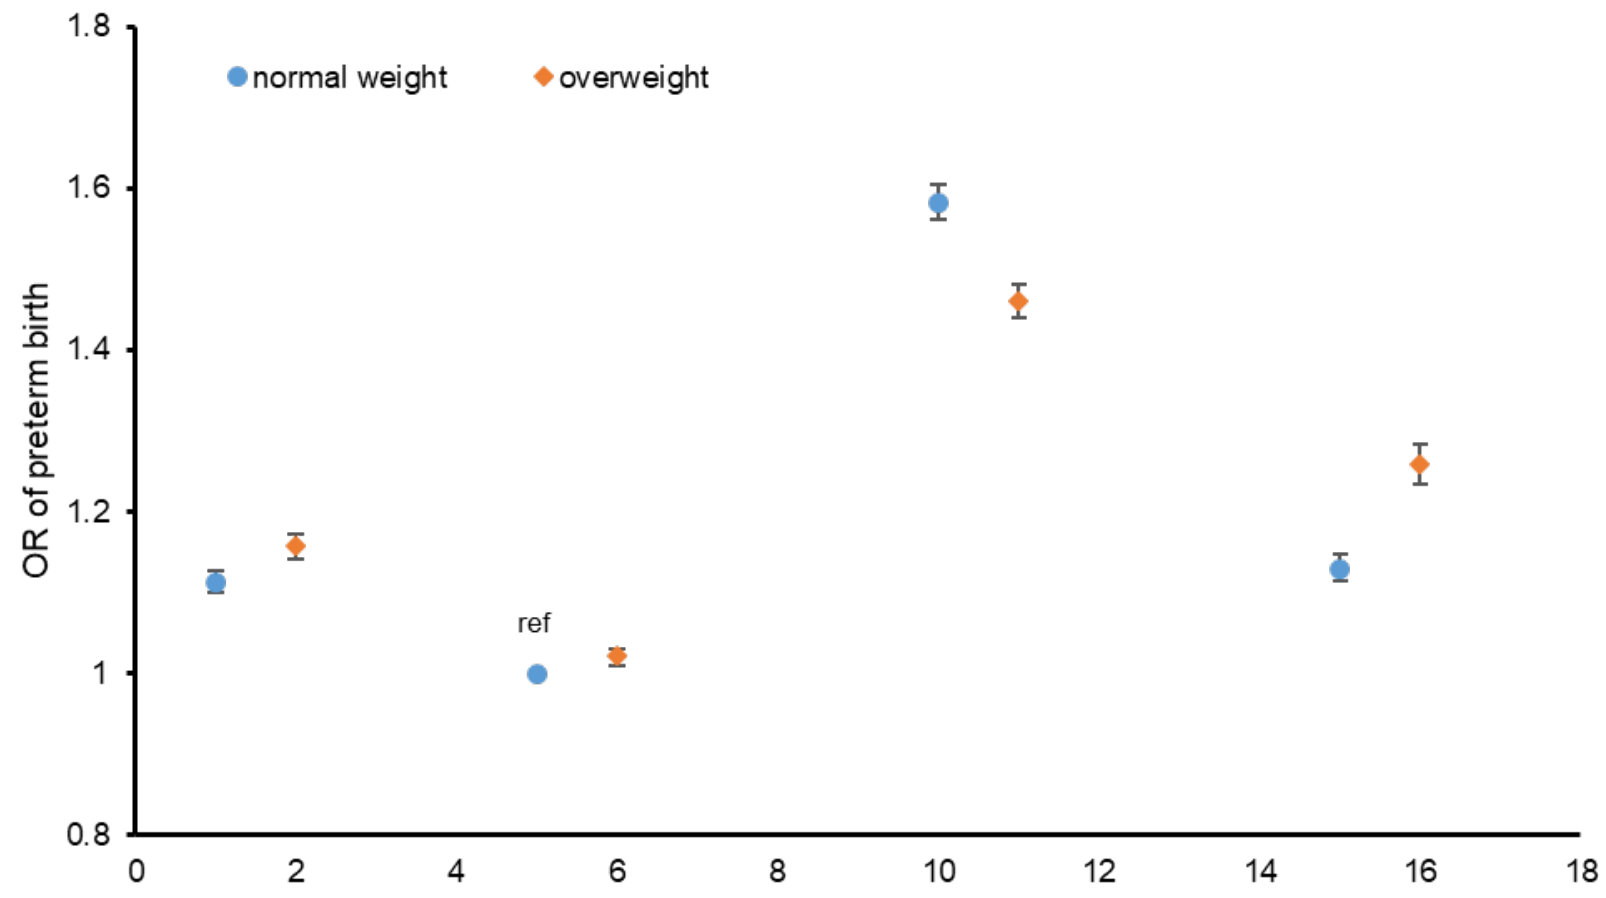

Figure S3. OR of preterm birth for women at different race/ethnicity and overweight compared with non-Hispanic whites with normal weight: NVSS 2016-2017.

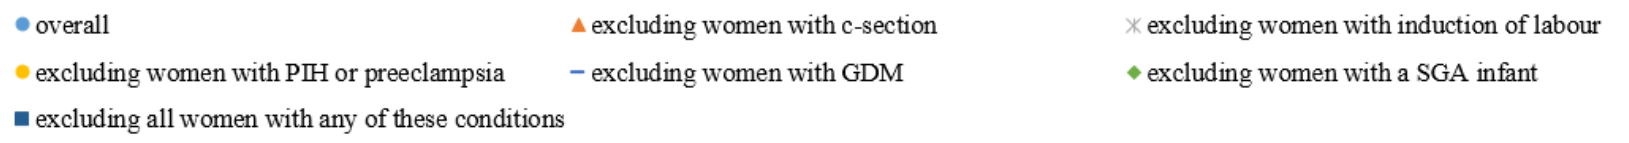

**(A) Hispanic**

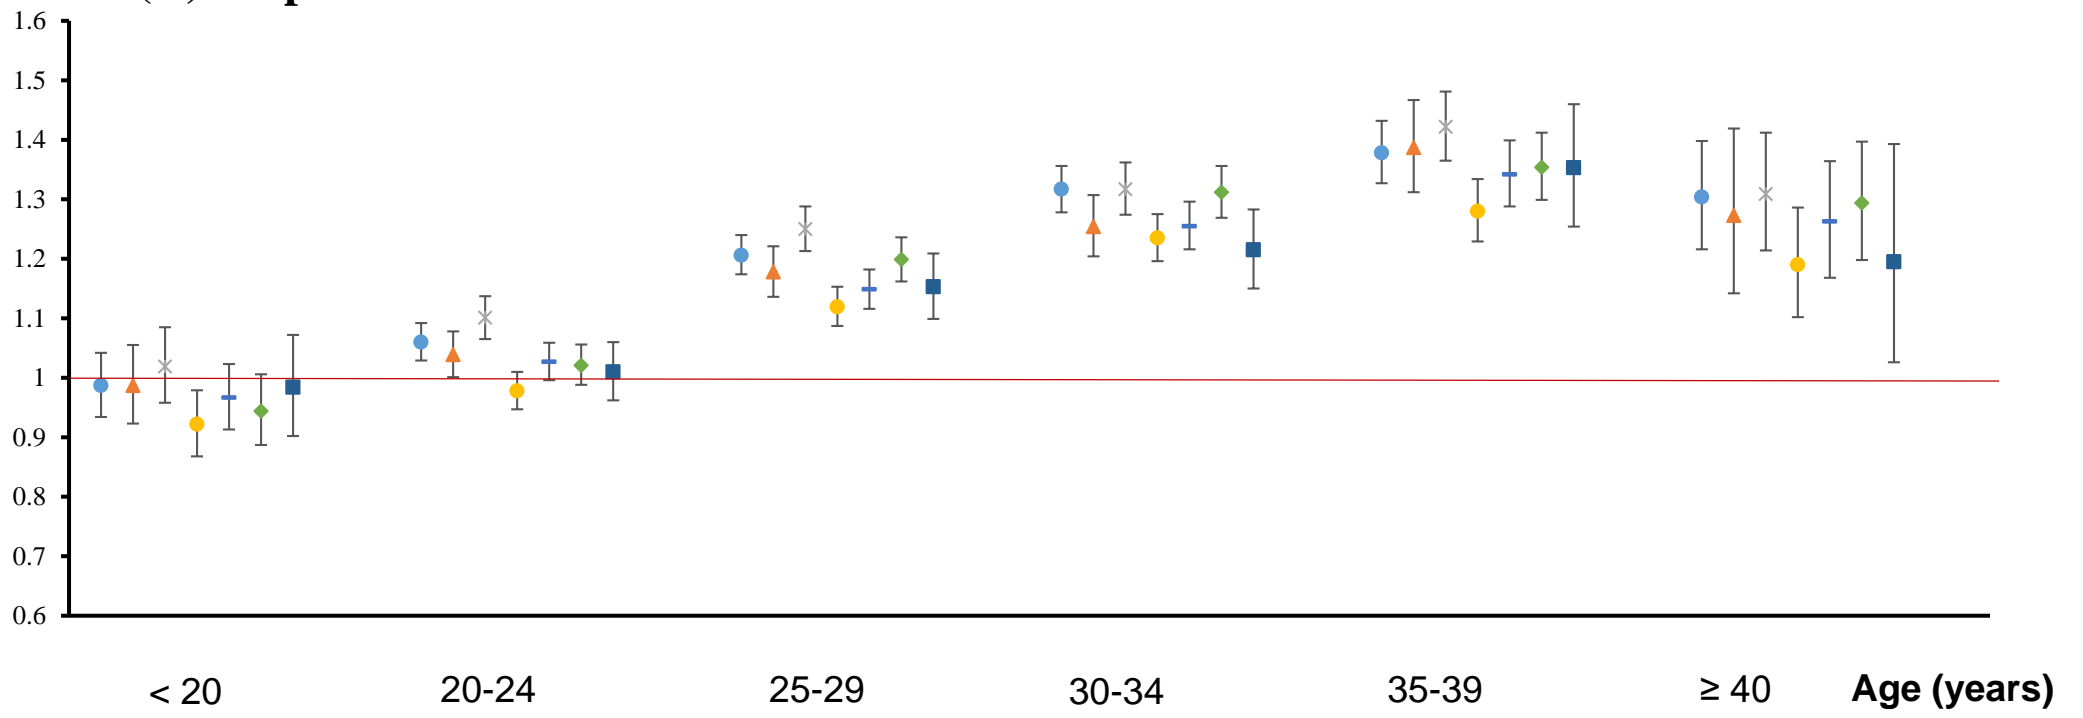

**(B) non-Hispanic white**

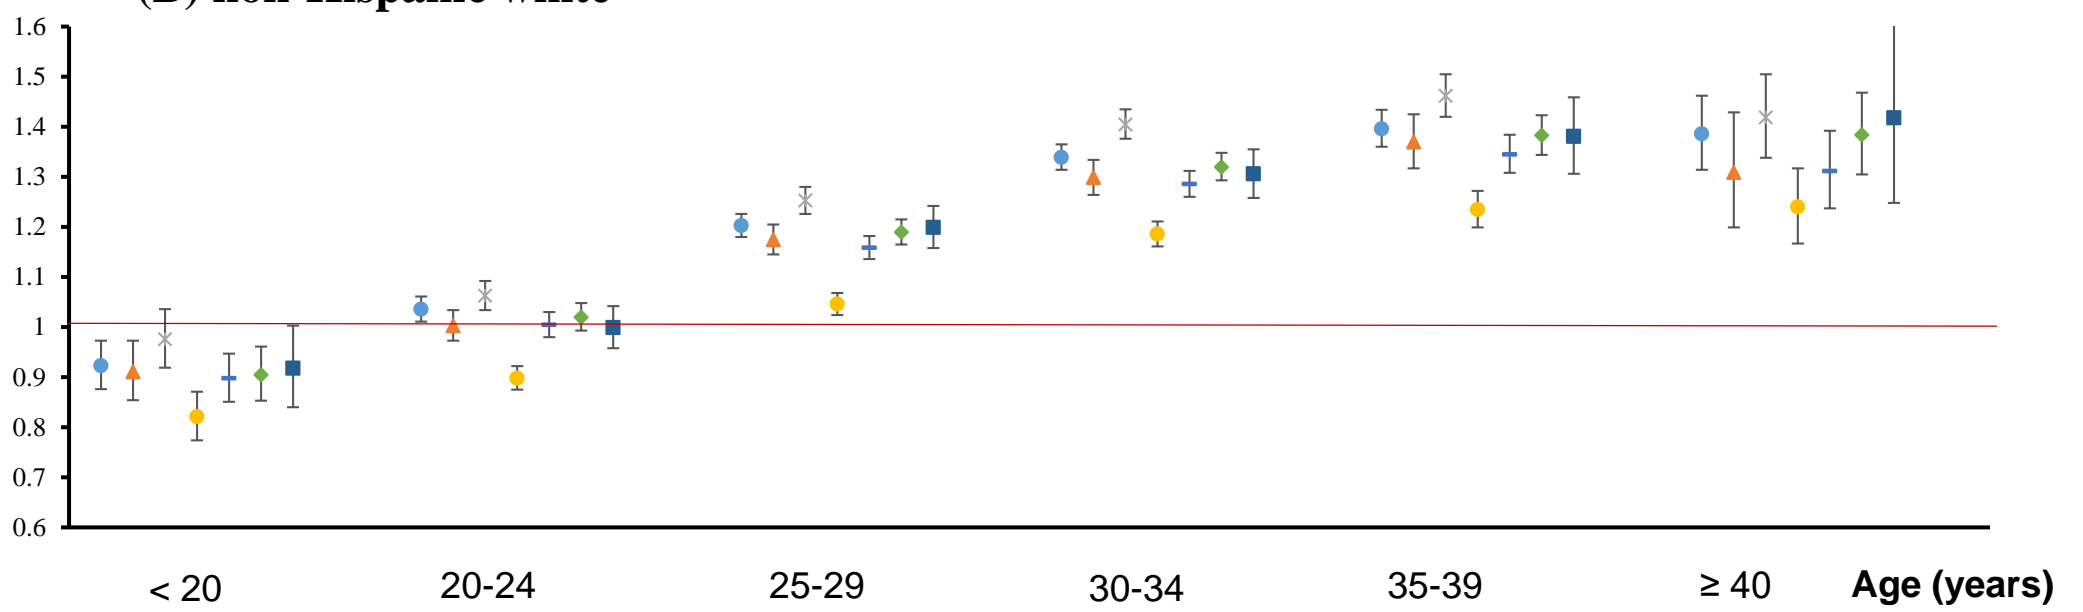

**(C) non-Hispanic black**

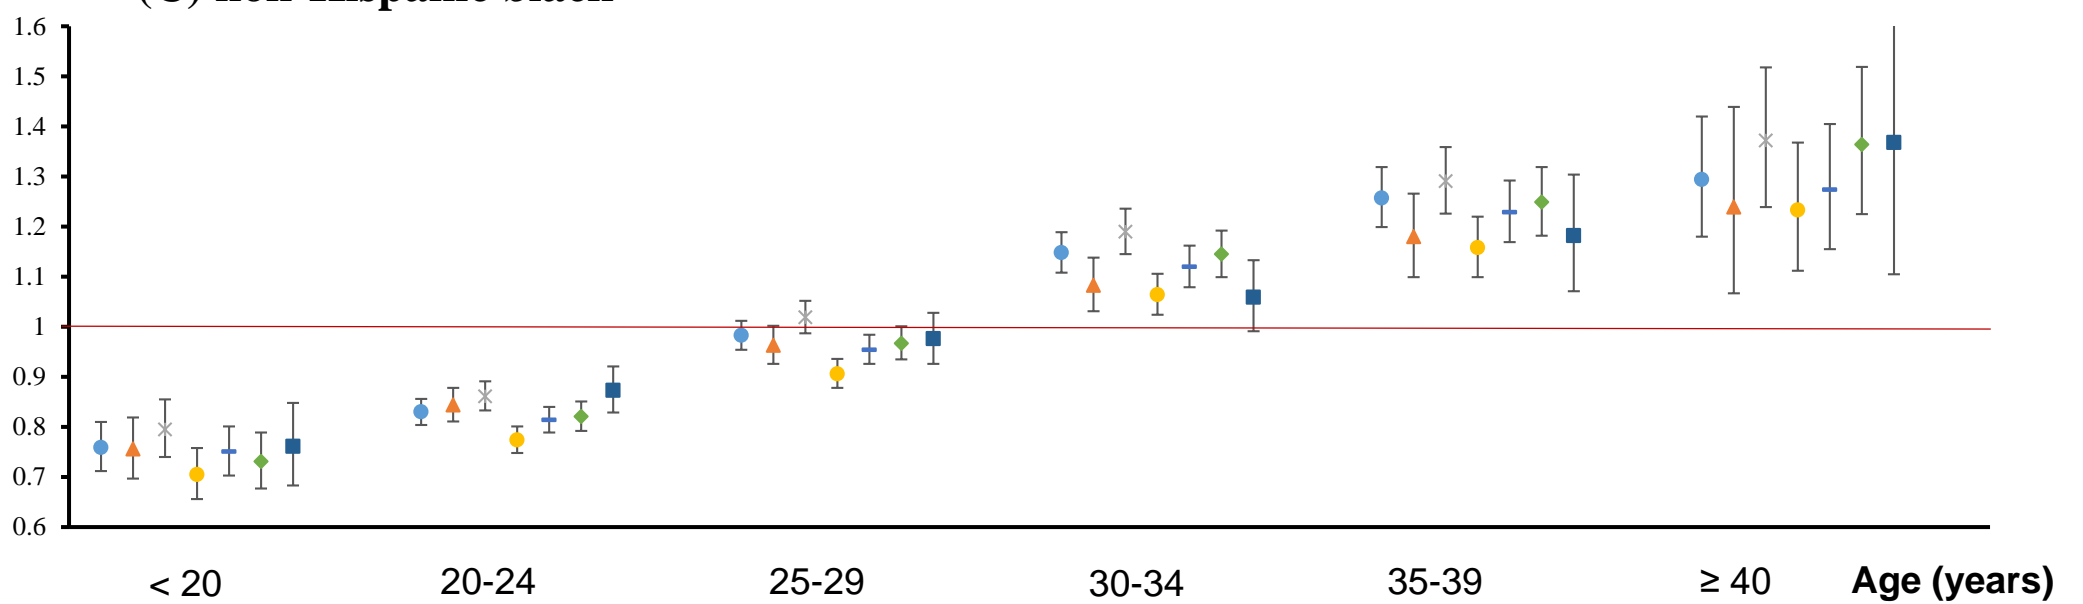

**(D) Other race/ethnicity**

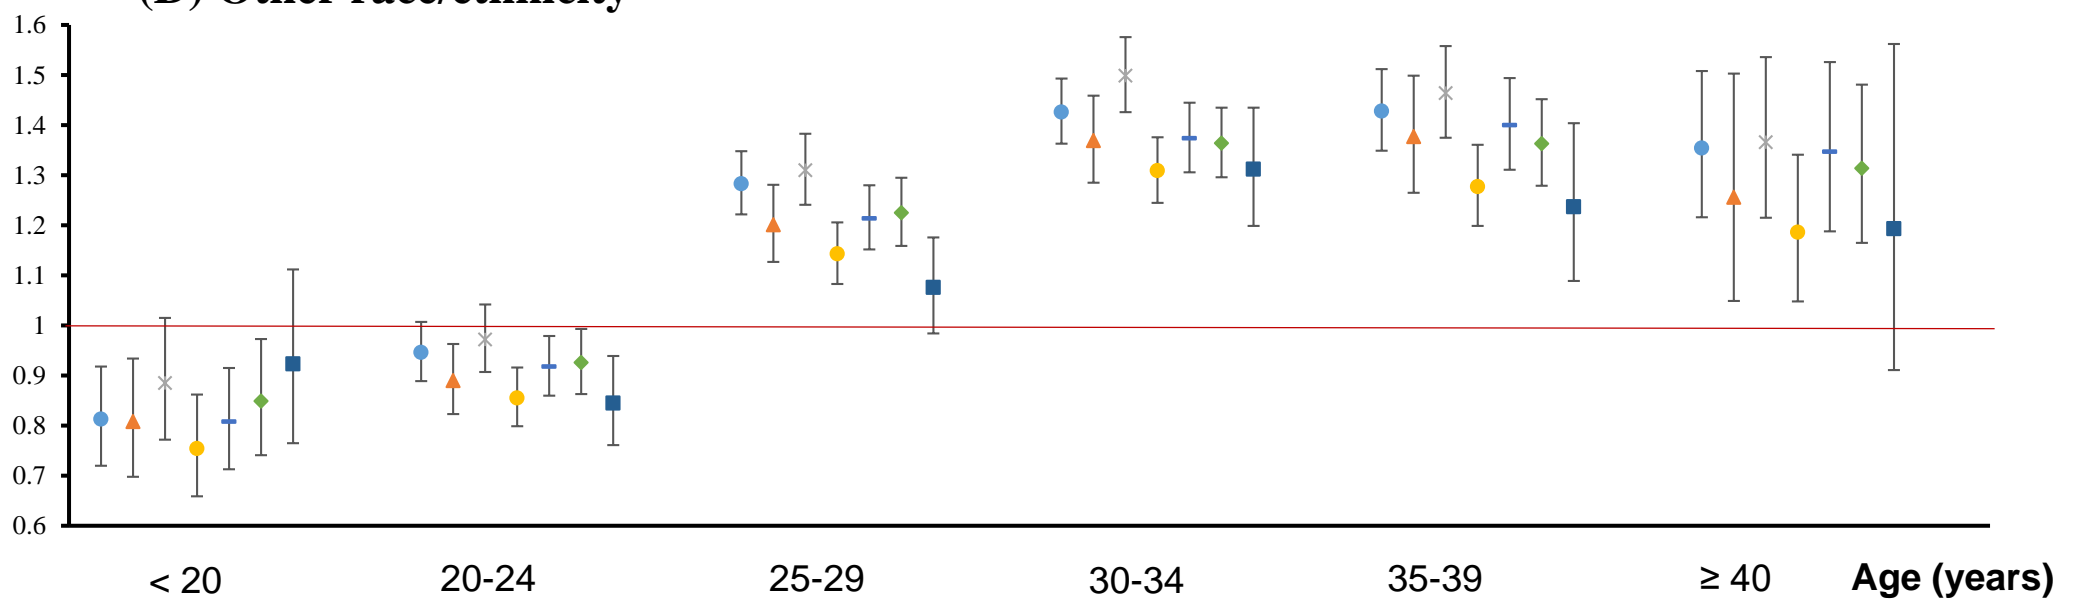

**Figure S4. Sensitivity analyses for the association between pre-pregnancy obesity and risk of preterm birth in each age\*race/ethnicity subgroup**

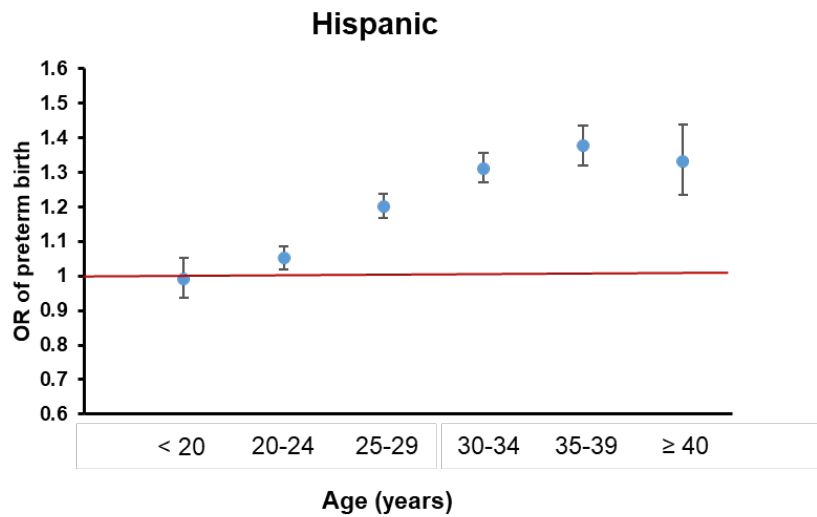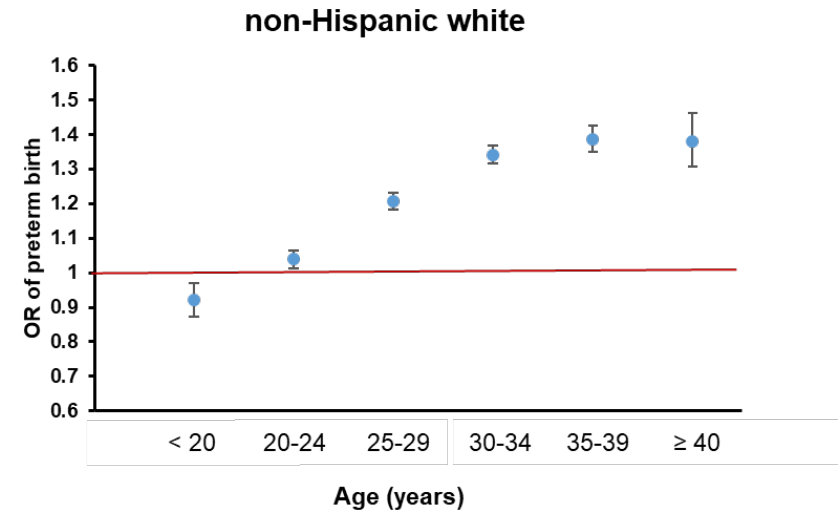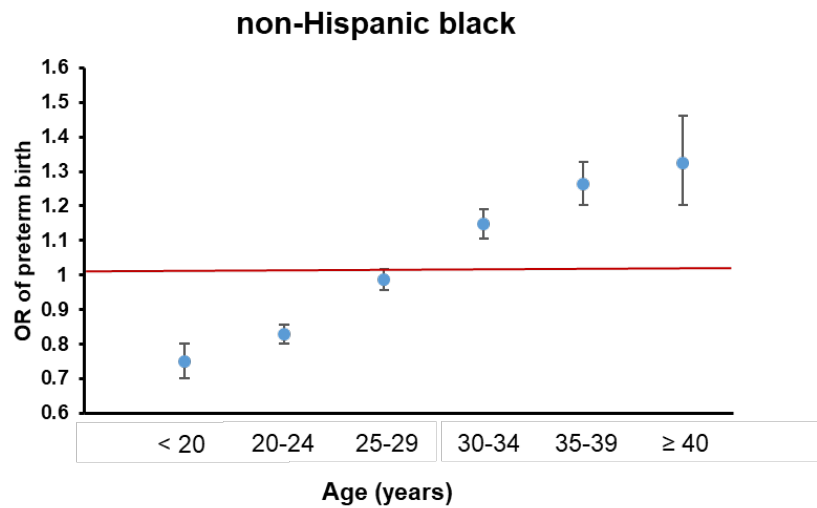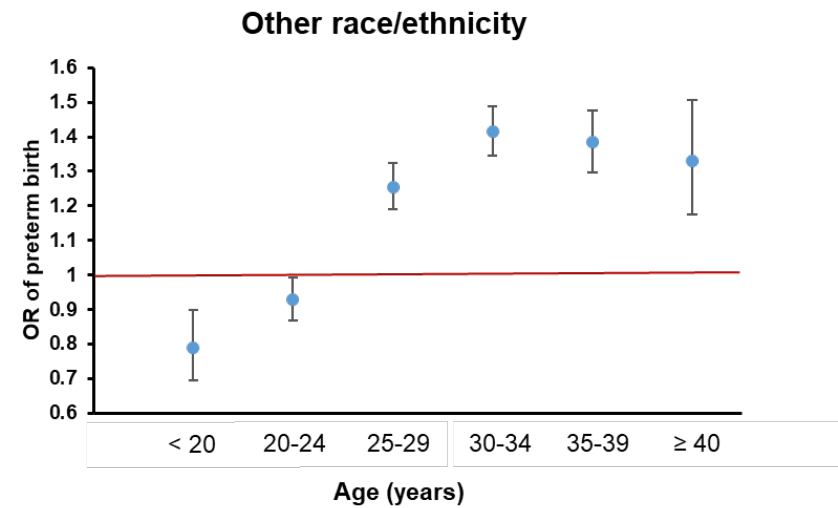

Figure S5. The associations between pre-pregnancy obesity and risk of preterm birth in each age\*race/ethnicity subgroup after additional excluding women with excluding participant with incomplete covariate data

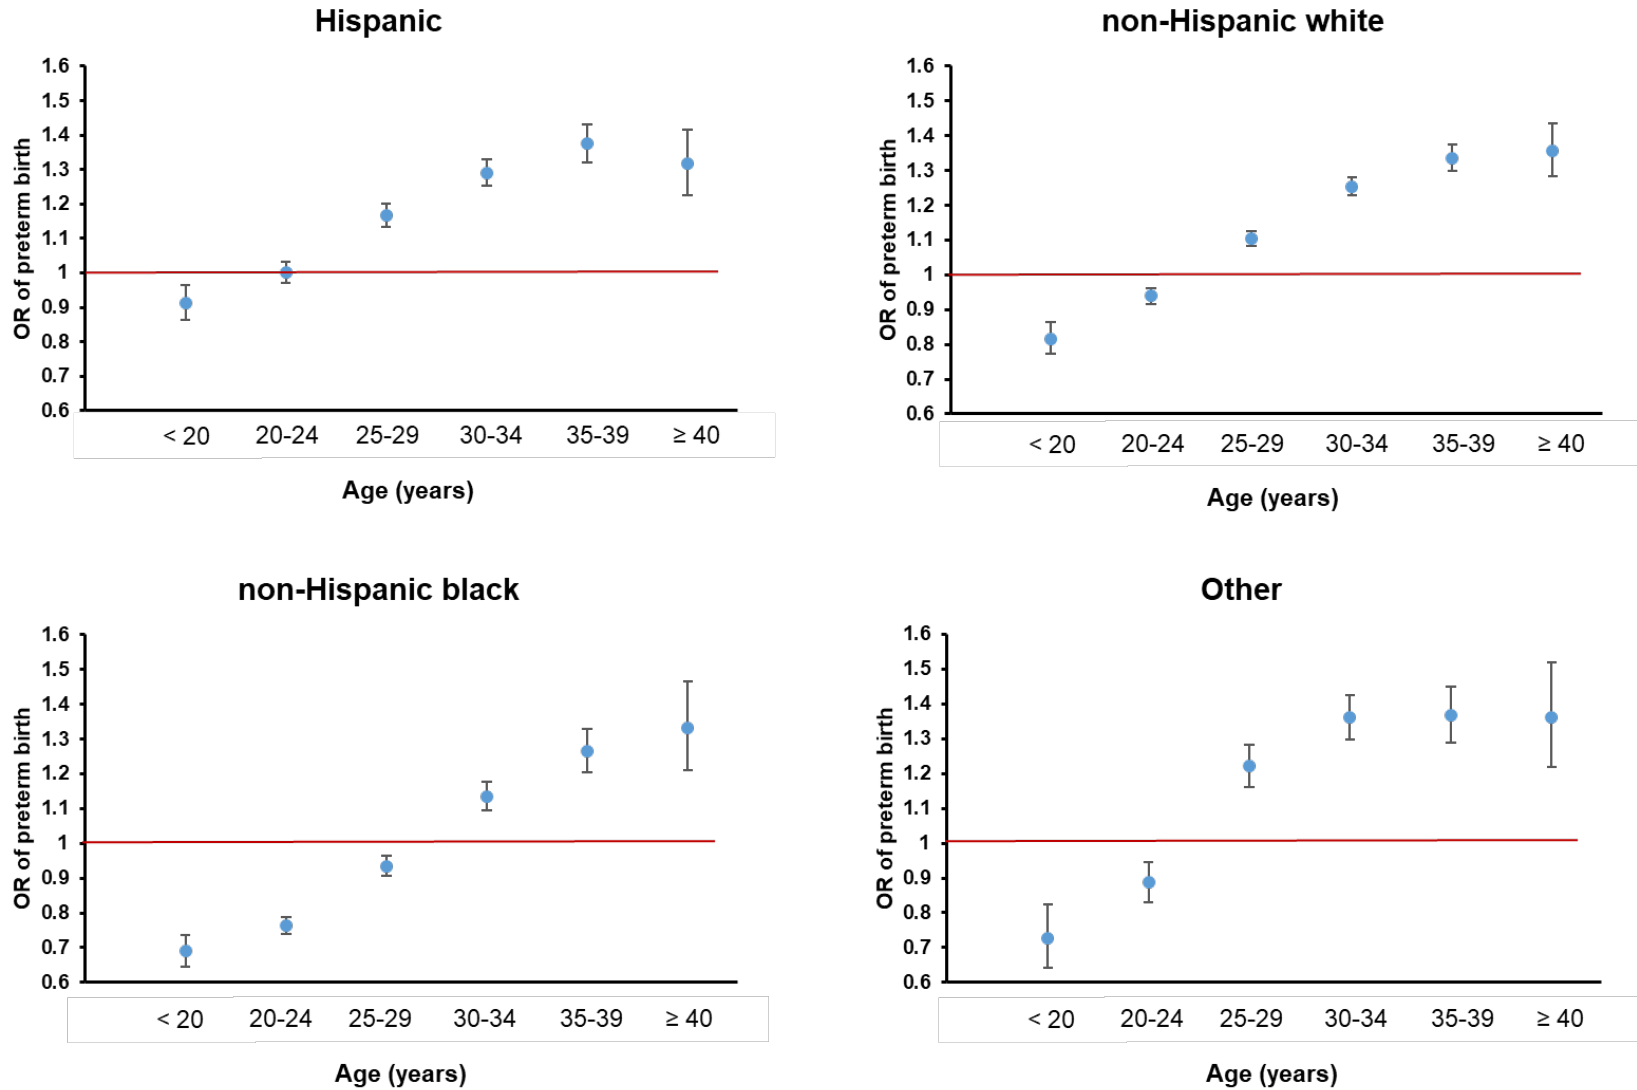

Figure S6. The associations between pre-pregnancy obesity and risk of preterm birth in each age\*race/ethnicity subgroup after additional adjustment for gestational weight gain
